# Supplementary material for: Plasticity in above- and belowground resource acquisition traits in response to single and multiple environmental factors in three tree species
Source: PubMed Central journal article supplement (PMC3631414; doi:10.1002/ece3.520), 2013-03-07
Supplement: ece30003-1065-SD1.pdf [file ece30003-1065-SD1.pdf]

## Supporting Information

**Table S1** Linear models of single and multiple environmental parameters' fit of leaf and fine root dry matter content of three sub-canopy tree species

|                            | Leaf dry matter content (mg g <sup>-1</sup> ) |                |      |                 |                |             |                  |                |             | Root dry matter content (mg g <sup>-1</sup> ) |                |             |                 |                |             |                  |                |             |
|----------------------------|-----------------------------------------------|----------------|------|-----------------|----------------|-------------|------------------|----------------|-------------|-----------------------------------------------|----------------|-------------|-----------------|----------------|-------------|------------------|----------------|-------------|
|                            | <i>Pittosporum</i>                            |                |      | <i>Coprosma</i> |                |             | <i>Melicytus</i> |                |             | <i>Pittosporum</i>                            |                |             | <i>Coprosma</i> |                |             | <i>Melicytus</i> |                |             |
|                            | Sign                                          | R <sup>2</sup> | AIC  | Sign            | R <sup>2</sup> | AIC         | Sign             | R <sup>2</sup> | AIC         | Sign                                          | R <sup>2</sup> | AIC         | Sign            | R <sup>2</sup> | AIC         | Sign             | R <sup>2</sup> | AIC         |
| Burrow density             | +                                             | 0.13           | 89.2 | +               | <b>0.43</b>    | <b>90.6</b> | +                | <b>0.59</b>    | <b>77.1</b> | -                                             | 0.27           | 97.2        | -               | 0.13           | 93.5        | -                | 0.50           | 81.1        |
| Soil Nutrient availability | +                                             | 0.11           | 89.7 | +               | 0.10           | 97.0        | +                | 0.09           | 86.8        | -                                             | 0.64           | 86.9        | -               | <b>0.63</b>    | <b>81.7</b> | -                | 0.58           | 78.8        |
| Soil Water content         | -                                             | 0.22           | 87.7 | -               | 0.17           | 95.8        | -                | 0.13           | 86.2        | +                                             | 0.04           | 101.4       | +               | 0.26           | 91.4        | +                | 0.10           | 88.1        |
| Light availability         | +                                             | 0.13           | 89.3 | +               | 0.35           | 92.5        | +                | 0.41           | 81.7        | +                                             | 0.01           | 101.9       | -               | 0.06           | 94.6        | -                | 0.02           | 89.1        |
| Burrow + Nutrient          | +, +                                          | 0.14           | 91.0 | +, -            | 0.45           | 92.0        | +, -             | <b>0.63</b>    | <b>78.1</b> | +, -                                          | 0.64           | 88.8        | +, -            | <b>0.67</b>    | <b>82.0</b> | -, -             | 0.69           | 77.5        |
| Burrow + Water             | +, -                                          | 0.26           | 88.8 | +, -            | 0.49           | 91.2        | +, -             | 0.60           | 79.0        | -, +                                          | 0.28           | 99.2        | -, +            | 0.30           | 92.4        | -, +             | 0.50           | 83.0        |
| Burrow + Light             | +, +                                          | 0.18           | 90.4 | +, +            | <b>0.54</b>    | <b>89.6</b> | +, +             | <b>0.66</b>    | <b>77.1</b> | -, +                                          | 0.40           | 96.3        | -, -            | 0.14           | 95.4        | -, +             | 0.58           | 81.0        |
| Nutrient + Water           | +, -                                          | 0.23           | 89.5 | +, -            | 0.19           | 97.5        | +, -             | 0.15           | 88.0        | -, -                                          | 0.68           | 86.8        | -, +            | 0.65           | 82.8        | -, -             | 0.60           | 80.4        |
| Nutrient + Light           | +, +                                          | 0.18           | 90.4 | +, +            | 0.37           | 94.1        | +, +             | 0.41           | 83.6        | -, +                                          | <b>0.77</b>    | <b>82.0</b> | -, +            | 0.63           | 83.7        | -, +             | 0.60           | 80.3        |
| Water + Light              | -, +                                          | 0.25           | 89.1 | -, +            | 0.38           | 93.7        | -, +             | 0.42           | 83.3        | +, +                                          | 0.08           | 102.8       | +, -            | 0.26           | 93.3        | +, -             | 0.10           | 90.1        |
| Burrow + Nutrient + Water  | +, -, -                                       | 0.27           | 90.7 | +, -, +         | 0.55           | 91.2        | +, -, -          | 0.65           | 79.2        | +, -, -                                       | 0.68           | 88.8        | +, -, +         | 0.69           | 83.1        | -, -, -          | 0.71           | 78.5        |
| Burrow + Nutrient + Light  | +, +, +                                       | 0.19           | 92.2 | +, -, +         | 0.57           | 90.7        | +, -, +          | <b>0.70</b>    | <b>77.6</b> | -, -, +                                       | 0.78           | 83.2        | +, -, -         | 0.67           | 83.8        | -, -, +          | <b>0.78</b>    | <b>75.0</b> |
| Burrow + Water + Light     | +, -, +                                       | 0.28           | 90.5 | +, -, +         | 0.56           | 91.1        | +, -, +          | 0.66           | 79.1        | -, +, +                                       | 0.43           | 97.6        | -, +, +         | 0.31           | 94.4        | -, +, +          | 0.59           | 82.6        |
| Nutrient + Water + Light   | +, -, +                                       | 0.25           | 91.0 | +, -, +         | 0.39           | 95.6        | +, -, +          | 0.42           | 85.3        | -, -, +                                       | 0.78           | 83.2        | -, +, +         | 0.65           | 84.7        | -, -, +          | 0.61           | 82.1        |

Signs of model parameters are displayed for each model. The fraction of total trait variation explained by each model is represented by regression coefficients R<sup>2</sup>. Models with Akaike's information criterion (AIC) ≤ (low est AIC + 1) were considered of high likelihood and indicated in bold. The number of tree populations is 15 for *Pittosporum crassifolium*, 14 for *Coprosma macrocarpa* and 12 for *Melicytus ramiflorus*.

**Table S2** Linear models of single and multiple environmental parameters' fit of leaf and fine root phosphorus concentration of three sub-canopy tree species

|                                                | Leaf phosphorus content (%) |                |       |                 |                |       |                  |                |              | Root phosphorus content (%) |                |              |                 |                |               |                  |                |              |
|------------------------------------------------|-----------------------------|----------------|-------|-----------------|----------------|-------|------------------|----------------|--------------|-----------------------------|----------------|--------------|-----------------|----------------|---------------|------------------|----------------|--------------|
|                                                | <i>Pittosporum</i>          |                |       | <i>Coprosma</i> |                |       | <i>Melicytus</i> |                |              | <i>Pittosporum</i>          |                |              | <i>Coprosma</i> |                |               | <i>Melicytus</i> |                |              |
|                                                | Sign                        | R <sup>2</sup> | AIC   | Sign            | R <sup>2</sup> | AIC   | Sign             | R <sup>2</sup> | AIC          | Sign                        | R <sup>2</sup> | AIC          | Sign            | R <sup>2</sup> | AIC           | Sign             | R <sup>2</sup> | AIC          |
| <i>Burrow</i> density                          | -                           | 0.02           | -75.7 | -               | 0.00           | -86.3 | +                | 0.03           | -47.2        | -                           | <b>0.28</b>    | <b>-90.9</b> | -               | 0.11           | -96.1         | -                | 0.10           | -80.3        |
| Soil <i>Nutrient</i> availability              | -                           | 0.02           | -75.8 | -               | 0.00           | -86.3 | +                | 0.33           | -51.6        | -                           | 0.01           | -86.1        | +               | 0.04           | -95.1         | +                | 0.02           | -79.3        |
| Soil <i>Water</i> content                      | +                           | 0.04           | -76.0 | +               | 0.07           | -87.3 | +                | 0.00           | -46.8        | +                           | 0.03           | -86.5        | +               | 0.04           | -95.1         | +                | 0.02           | -79.3        |
| <i>Light</i> availability                      | -                           | 0.00           | -75.5 | -               | 0.02           | -86.5 | -                | 0.04           | -47.3        | -                           | 0.12           | -87.9        | -               | 0.10           | -96.0         | -                | <b>0.19</b>    | <b>-81.6</b> |
| <i>Burrow</i> + <i>Nutrient</i>                | -, -                        | 0.02           | -73.8 | -, -            | 0.00           | -84.3 | -, +             | 0.37           | -50.4        | -, +                        | <b>0.40</b>    | <b>-91.6</b> | -, +            | <b>0.40</b>    | <b>-99.7</b>  | -, +             | <b>0.26</b>    | <b>-80.7</b> |
| <i>Burrow</i> + <i>Water</i>                   | -, +                        | 0.04           | -74.1 | +, +            | 0.08           | -85.4 | +, +             | 0.03           | -45.2        | -, +                        | 0.28           | -88.9        | -, +            | 0.12           | -94.3         | -, +             | 0.10           | -78.3        |
| <i>Burrow</i> + <i>Light</i>                   | -, +                        | 0.02           | -73.7 | +, -            | 0.02           | -84.5 | +, -             | 0.14           | -46.7        | -, -                        | 0.29           | -89.2        | -, -            | 0.14           | -94.7         | -, -             | 0.20           | -79.7        |
| <i>Nutrient</i> + <i>Water</i>                 | -, +                        | 0.04           | -74.0 | +, +            | 0.08           | -85.5 | +, +             | 0.47           | -52.4        | -, +                        | 0.03           | -84.5        | +, +            | 0.15           | -94.8         | +, +             | 0.09           | -78.2        |
| <i>Nutrient</i> + <i>Light</i>                 | -, +                        | 0.02           | -73.8 | +, -            | 0.02           | -84.5 | +, -             | <b>0.51</b>    | <b>-53.5</b> | +, -                        | 0.12           | -85.9        | +, -            | 0.20           | -95.7         | +, -             | <b>0.30</b>    | <b>-81.3</b> |
| <i>Water</i> + <i>Light</i>                    | +, +                        | 0.04           | -74.0 | +, -            | 0.07           | -85.3 | -, -             | 0.04           | -45.4        | +, -                        | 0.12           | -85.9        | +, -            | 0.11           | -94.1         | -, -             | 0.19           | -79.6        |
| <i>Burrow</i> + <i>Nutrient</i> + <i>Water</i> | -, -, +                     | 0.04           | -72.1 | -, +, +         | 0.08           | -83.5 | -, +, +          | 0.50           | -51.0        | -, +, +                     | 0.42           | -90.2        | -, +, +         | <b>0.52</b>    | <b>-100.7</b> | -, +, +          | 0.30           | -79.4        |
| <i>Burrow</i> + <i>Nutrient</i> + <i>Light</i> | -, -, +                     | 0.02           | -71.8 | +, -, -         | 0.02           | -82.5 | -, +, -          | 0.51           | -51.5        | -, +, -                     | 0.42           | -90.1        | -, +, -         | 0.45           | -98.8         | -, +, -          | <b>0.38</b>    | <b>-80.8</b> |
| <i>Burrow</i> + <i>Water</i> + <i>Light</i>    | -, +, +                     | 0.04           | -72.1 | +, +, -         | 0.08           | -83.4 | +, -, -          | 0.14           | -44.7        | -, -, -                     | 0.29           | -87.2        | -, +, -         | 0.14           | -92.7         | -, -, -          | 0.20           | -77.8        |
| <i>Nutrient</i> + <i>Water</i> + <i>Light</i>  | -, +, +                     | 0.04           | -72.1 | +, +, -         | 0.09           | -83.5 | +, +, -          | <b>0.59</b>    | <b>-53.6</b> | +, +, -                     | 0.12           | -83.9        | +, +, -         | 0.25           | -94.5         | +, +, -          | 0.32           | -79.7        |

Signs of model parameters are displayed for each model. The fraction of total trait variation explained by each model is represented by regression coefficients R<sup>2</sup>. Models with Akaike's information criterion (AIC) ≤ (low est AIC + 1) were considered of high likelihood and indicated in bold. The number of tree populations is 15 for *Pittosporum crassifolium*, 14 for *Coprosma macrocarpa* and 12 for *Melicytus ramiflorus*.
